# Supplementary material for: Mucus-Penetrating Silk Fibroin-Based Nanotherapeutics for Efficient Treatment of Ulcerative Colitis
Source: MDPI journal article supplement (doi:10.3390/biom12091263), 2022-09-08
Supplement: s1 [file s1]

## Supplementary Materials

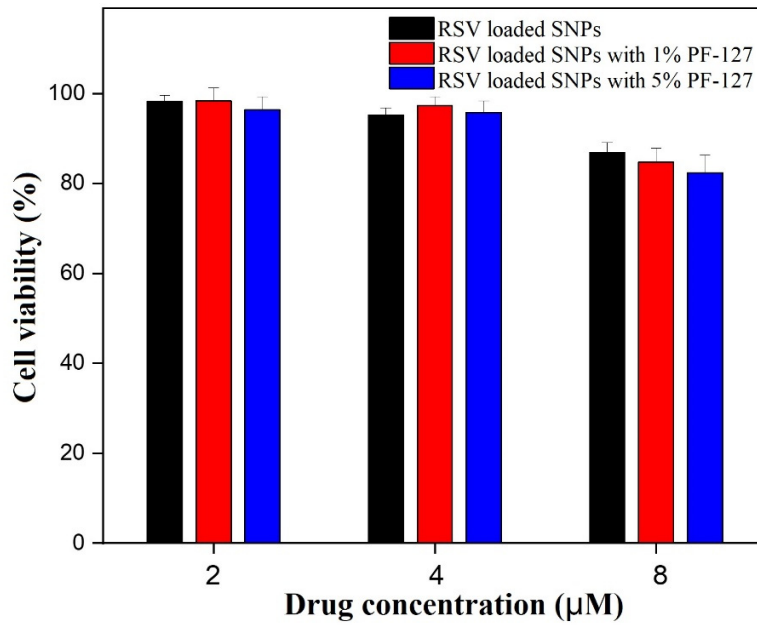

**Figure S1.** Cell viability of macrophages after incubation with various SNPs for 24 h. Data are expressed as means  $\pm$  S.E.M. ( $n = 5$ ).

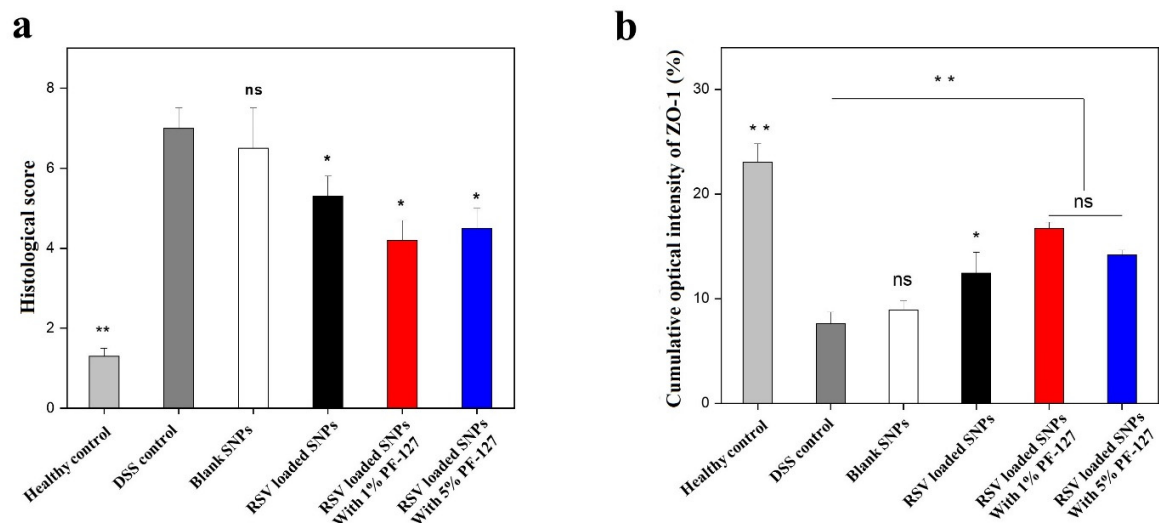

**Figure S2.** (a) Histological scores from H&E stained colons and (b) immunohistochemical analysis of the expression profile of ZO-1. Each point represents the mean  $\pm$  S.E.M. (n = 3).
